# Supplementary material for: Creation of Artificial Luciferase 60s from Sequential Insights and Their Applications to Bioassays
Source: MDPI journal article supplement (doi:10.3390/s23146376), 2023-07-13
Supplement: s1 [file s1]

## Suppl. Information

```

1      20      40      60      80
ALuc49  MMGIKVL FALVCLALVQAKPTEDEDEDIVDVVGNFWAI GVDNDRDFTIS-----ADRGKLP GK L PKEVL IEIEANAKKAGCT GCLICLSKIKCTAKMKKW
ALuc55  MMGIKVL FALVCLALVQAKPTEDEDEDIVDVVGNFWAI GVDNDRDFTISGRCHSYEG-----ADRGKLP GK L PKEVL IEIEANAKKAGCTRGCLICLSKIKCTAKMKKW
ALuc56  MMGIKVL FALVCLALVQAKPTEDEDEDIVDVVGNFWAI GVDNDRDFTISGRCHSYEGD DTGQG-----ADRGKLP GK L PKEVL IEIEANAKKAGCTRGCLICLSKIKCTAKMKKW
ALuc57  MMGIKVL FALVCLALVQAKPTEDEDEDIVDVVGNFWAI GVDNDRDFTISGRCHSYEGD DTGQGGI-GEPIADRGKLP GK L PKEVL IEIEANAKKAGCTRGCLICLSKIKCTAKMKKW
ALuc60  MMGIKVL FALVCLALVQAKPTEDEDEDIVDVVGNFWAI GVDNDRDFTISDRCASFA-----ADRGKLP GK L PKEVL IEIEANAKKAGCTRGCLICLSKIKCTAKMKKW
ALuc61  MMGIKVL FALVCLALVQAKPTEDEDEDIVDVVGNFWAI GVDNDRDFTISDRCASFADK IQKEV-----ADRGKLP GK L PKEVL IEIEANAKKAGCTRGCLICLSKIKCTAKMKKW
ALuc62  MMGIKVL FALVCLALVQAKPTEDEDEDIVDVVGNFWAI GVDNDRDFTISDRCASFADK IQKEVDYIKLAGADRGKLP GK L PKEVL IEIEANAKKAGCTRGCLICLSKIKCTAKMKKW
ALuc65  MMGIKVL FALVCLALVQAKPTEDEDEDIVDVVGNFWAI GVDNDRDKWL PGRCHSYEG-----ADRGKLP GK L PKEVL IEIEANAKKAGCTRGCLICLSKIKCTAKMKKW
ALuc66  MMGIKVL FALVCLALVQAKPTEDEDEDIVDVVGNFWAI GVDNDRDKWL PGRCHSYEG-----ADRGKLP GK L PKEVL IEIEANAKKAGCTRGCLICLSKIKCTAKMKKW
ALuc67  MMGIKVL FALVCLALVQAKPTEDEDEDIVDVVGNFWAI GVDNDRDKWL PGRCHSYEGD DTGQG-----ADRGKLP GK L PKEVL IEIEANAKKAGCTRGCLICLSKIKCTAKMKKW
ALuc68  MMGIKVL FALVCLALVQAKPTEDEDEDIVDVVGNFWAI GVDNDRDKWL PGRCHSYEGD DTGQGGI-GEPIADRGKLP GK L PKEVL IEIEANAKKAGCTRGCLICLSKIKCTAKMKKW
***** :. *****

100      120      140      160      180      190      200      210
ALuc49  L PGRCHSYEGDKDTGQGIGEP IVD APEIPGFKD LTPMEQ FIAQVDLCADCTTGCLKGLANV KCSALLKKWL PDRCASFADK IQKEVDYIKGLAGS
ALuc55  L PGRCHSYEGDKDTGQGIGEP IVD APEIPGFKD LTPMEQ FIAQVDLCADCTTGCLKGLANVKCSALLKKWL PDRCASFADK IQKEVDYIKGLAGS
ALuc56  L PGRCHSYEGDKDTGQGIGEP IVD APEIPGFKD LTPMEQ FIAQVDLCADCTTGCLKGLANVKCSALLKKWL PDRCASFADK IQKEVDYIKGLAGS
ALuc57  L PGRCHSYEGDKDTGQGIGEP IVD APEIPGFKD LTPMEQ FIAQVDLCADCTTGCLKGLANVKCSALLKKWL PDRCASFADK IQKEVDYIKGLAGS
ALuc60  L PGRCHSYEGDKDTGQGIGEP IVD APEIPGFKD LTPMEQ FIAQVDLCADCTTGCLKGLANVKCSALLKKWL PDRCASFADK IQKEVDYIKGLAGS
ALuc61  L PGRCHSYEGDKDTGQGIGEP IVD APEIPGFKD LTPMEQ FIAQVDLCADCTTGCLKGLANVKCSALLKKWL PDRCASFADK IQKEVDYIKGLAGS
ALuc62  L PGRCHSYEGDKDTGQGIGEP IVD APEIPGFKD LTPMEQ FIAQVDLCADCTTGCLKGLANVKCSALLKKWL PDRCASFADK IQKEVDYIKGLAGS
ALuc65  L PGRCHSYEGDKDTGQGIGEP IVD APEIPGFKD LTPMEQ FIAQVDLCADCTTGCLKGLANVKCSALLKKWL PDRCASFADK IQKEVDYIKGLAGS
ALuc66  L PGRCHSYEGDKDTGQGIGEP IVD APEIPGFKD LTPMEQ FIAQVDLCADCTTGCLKGLANVKCSALLKKWL PDRCASFADK IQKEVDYIKGLAGS
ALuc67  L PGRCHSYEGDKDTGQGIGEP IVD APEIPGFKD LTPMEQ FIAQVDLCADCTTGCLKGLANVKCSALLKKWL PDRCASFADK IQKEVDYIKGLAGS
ALuc68  L PGRCHSYEGDKDTGQGIGEP IVD APEIPGFKD LTPMEQ FIAQVDLCADCTTGCLKGLANVKCSALLKKWL PDRCASFADK IQKEVDYIKGLAGS
*****

```

**Suppl. Figure S1.** Multiple sequence alignment of new Artificial luciferases (ALucs) compared with ALuc49. Every 20th amino acid was highlighted in colors.



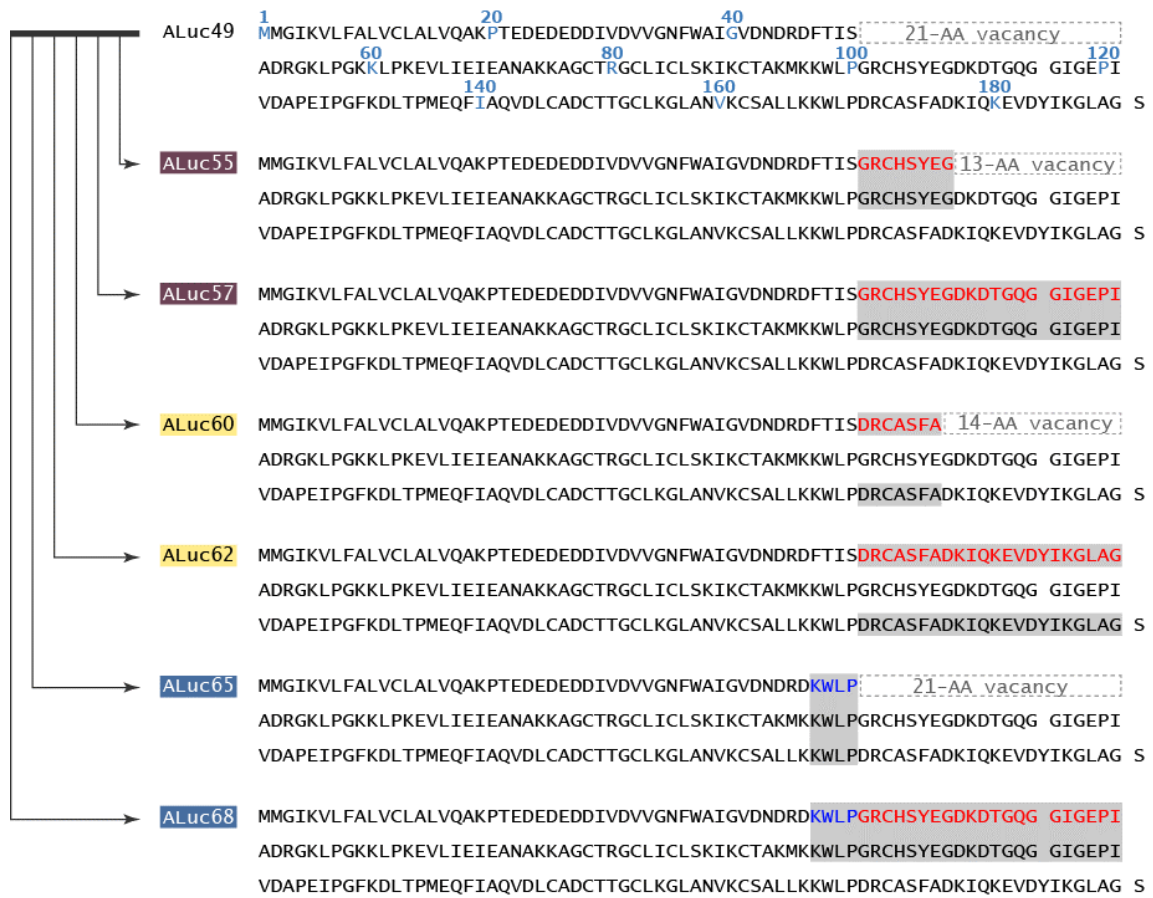

**Suppl. Figure S2.** Single-sequence alignments (SSAs) of new ALucs to highlight the appended sequences. The gray shadows highlight the characteristic sequence blocks.

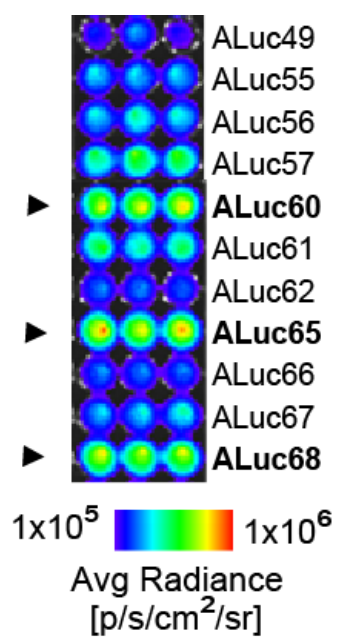

**Suppl. Figure S3.** The representative BL image of the new ALucs in the presence of native coelenterazine (nCTZ). This is the optical image of Figure 2A.

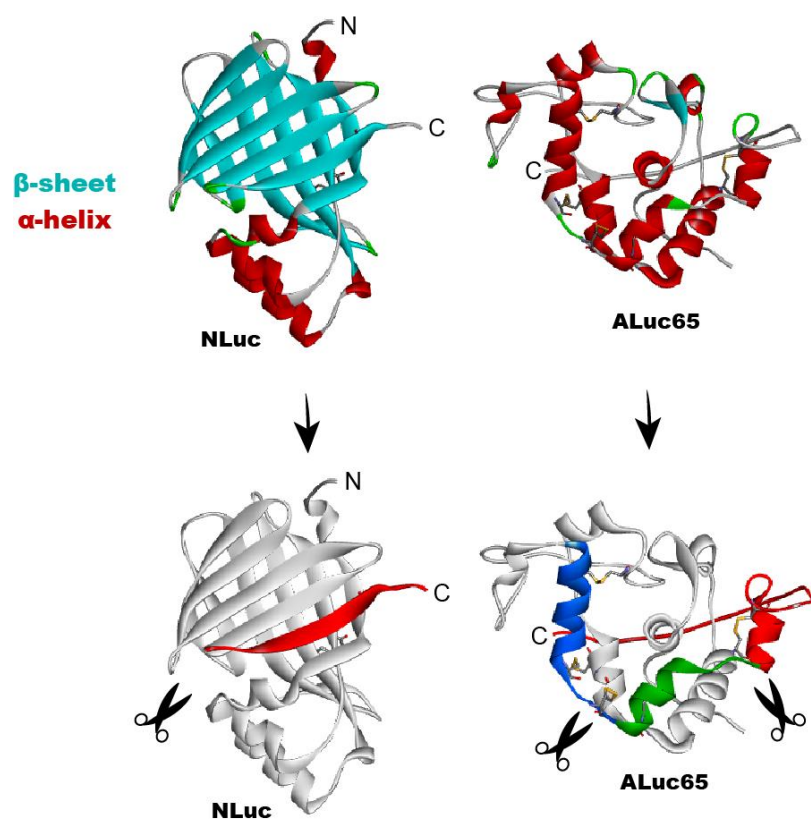

**Suppl. Figure S4.** Three dimensional structures of NLuc and ALuc65 showing the  $\alpha$ -helices and  $\beta$ -sheets. Inspired by the molecular structures, we decided the fragmentation sites for single-chain BL probes. The scissors marks highlight the dissection sites that are located at the hinge regions between  $\alpha$ -helices or  $\beta$ -sheets. The structural models of new ALucs (ALuc60–68), which were created using SWISS-MODEL (<https://swissmodel.expasy.org>) [1]

**Suppl. Table S1.** Homologous proteins (rankings) of ALuc56, ALuc65, and ALuc68. Those were searched by NCBI BLAST.

| ALuc56  |                                                      |              |              |
|---------|------------------------------------------------------|--------------|--------------|
| Ranking | Name                                                 | Accession ID | Identity (%) |
| 1       | Synthetic construct (S-14D5α-MLuc7-H7)               | QND76010.1   | 76.4%        |
| 2       | <i>Pleuromamma xiphias</i> luciferase                | BAN91830.1   | 74.8%        |
| 3       | Synthetic construct (ALuc34)                         | AYN79601.1   | 72.8%        |
| 4       | <i>Metridia pacifica</i> luciferase                  | BAG48249.1   | 72.5%        |
| ALuc65  |                                                      |              |              |
| Ranking | Name                                                 | Accession ID | Identity (%) |
| 1       | Synthetic construct (S-14D5α-MLuc7-H7)               | QND76010.1   | 77.2%        |
| 2       | <i>Pleuromamma xiphias</i> luciferase                | BAN91830.1   | 74.8%        |
| 3       | Hypothetical protein from <i>Salmonella enterica</i> | EAU0845767.1 | 74.4%        |
| 4       | Hypothetical protein from <i>Salmonella enterica</i> | EAQ6767855.1 | 73.5%        |
| ALuc68  |                                                      |              |              |
| Ranking | Name                                                 | Accession ID | Identity (%) |
| 1       | <i>Metridia pacifica</i> luciferase                  | BAD93334.1   | 79.3%        |
| 2       | Synthetic construct (S-14D5α-MLuc7-H7)               | QND76010.1   | 77.2%        |
| 3       | <i>Metridia longa</i> luciferase 2                   | APQ47582.1   | 75.0%        |
| 4       | <i>Pleuromamma xiphias</i> luciferase                | BAN91830.1   | 74.8%        |

**Suppl. Table S2.** Relative optical intensity values of the bar graphs in Figure 1D, compared to those of GLuc. The terms, “Luc” and “Sub”, denote marine luciferase and substrate, respectively.

| Sub<br>Luc  |      |      |       |       |      |     |     |     |     |     |     |     |
|-------------|------|------|-------|-------|------|-----|-----|-----|-----|-----|-----|-----|
|             | nCTZ | 1a   | 1b    | 1c    | 1d   | 2a  | 2b  | 2c  | 2d  | 3a  | 3b  | 3c  |
| GLuc        | 1.0  | 1.0  | 1.0   | 1.0   | 1.0  | 1.0 | 1.0 | 1.0 | 1.0 | 1.0 | 1.0 | 1.0 |
| MLuc        | 0.3  | 1.0  | 1.2   | 4.3   | 1.4  | 1.1 | 1.0 | 1.0 | 1.0 | 1.1 | 1.0 | 0.9 |
| RLuc8.6-535 | 1.8  | 81.6 | 941.9 | 159.8 | 22.2 | 1.4 | 1.0 | 1.0 | 1.0 | 1.0 | 1.0 | 0.8 |
| ALuc16      | 13.6 | 9.0  | 5.8   | 5.4   | 2.8  | 1.4 | 1.1 | 3.6 | 1.7 | 1.1 | 1.0 | 1.0 |
| ALuc23      | 5.6  | 5.3  | 2.1   | 2.7   | 1.4  | 1.4 | 1.3 | 1.2 | 1.2 | 1.3 | 1.2 | 1.1 |
| ALuc49      | 19.8 | 11.8 | 4.8   | 8.7   | 2.7  | 1.5 | 1.4 | 1.9 | 1.4 | 1.2 | 1.2 | 1.0 |
| ALuc55      | 19.7 | 10.6 | 4.9   | 8.8   | 2.4  | 1.3 | 1.3 | 1.8 | 1.2 | 1.1 | 1.1 | 0.8 |
| ALuc56      | 26.3 | 13.1 | 4.9   | 8.8   | 2.5  | 1.3 | 1.2 | 1.9 | 1.1 | 0.9 | 0.9 | 0.8 |
| ALuc57      | 6.7  | 2.2  | 3.8   | 8.1   | 1.9  | 0.9 | 0.9 | 2.1 | 0.9 | 0.7 | 0.7 | 0.7 |
| ALuc60      | 18.4 | 5.8  | 8.4   | 15.5  | 3.6  | 1.0 | 1.0 | 3.7 | 1.4 | 0.8 | 0.9 | 0.8 |
| ALuc61      | 11.9 | 4.4  | 4.3   | 7.6   | 2.0  | 1.0 | 0.8 | 2.0 | 1.1 | 0.7 | 0.7 | 0.6 |
| ALuc62      | 8.7  | 4.0  | 3.0   | 5.1   | 1.5  | 0.8 | 0.7 | 1.4 | 0.7 | 0.8 | 0.8 | 0.6 |
| ALuc65      | 30.9 | 6.4  | 9.1   | 18.7  | 4.4  | 1.4 | 1.5 | 3.6 | 1.6 | 1.1 | 1.1 | 0.8 |
| ALuc66      | 9.8  | 2.8  | 4.1   | 8.1   | 2.3  | 1.4 | 1.3 | 1.7 | 1.1 | 1.2 | 0.7 | 0.6 |
| ALuc67      | 22.4 | 5.1  | 5.8   | 11.6  | 2.6  | 1.3 | 1.2 | 2.7 | 1.2 | 0.8 | 0.8 | 0.6 |
| ALuc68      | 34.5 | 7.3  | 6.5   | 13.4  | 3.0  | 1.1 | 1.2 | 2.5 | 1.4 | 0.8 | 0.8 | 0.9 |

## References

1. Waterhouse, A.; Bertoni, M.; Bienert, S.; Studer, G.; Tauriello, G.; Gumienny, R.; Heer, F. T.; de Beer, T. A. P.; Rempfer, C.; Bordoli, L.; Lepore, R.; Schwede, T., SWISS-MODEL: homology modelling of protein structures and complexes. *Nucleic Acids Res.* **2018**, 46, (W1), W296-W303.
